# Supplementary material for: Protective Immunization of Atlantic Salmon (Salmo salar L.) against Salmon Lice (Lepeophtheirus salmonis) Infestation
Source: MDPI journal article supplement (doi:10.3390/vaccines10010016), 2021-12-23
Supplement: s1 [file s1]

**Supplementary Table S1.** Shows the analyses performed on fish blood and tissue samples and the groups and the number of fish used per each analysis.

| Analyses                                                             | Samples collected and analyzed at different time points (WPV) |    |    |    |     |    |    |    |     |    |    |    |
|----------------------------------------------------------------------|---------------------------------------------------------------|----|----|----|-----|----|----|----|-----|----|----|----|
|                                                                      | 7                                                             |    |    |    | 14  |    |    |    | 18  |    |    |    |
|                                                                      | PL                                                            | AK | Sp | Sk | PL  | AK | Sp | Sk | PL  | AK | Sp | Sk |
| Specific P33 Ab in plasma (n≥10/group)                               | ●◆■                                                           |    |    |    | ●◆■ |    |    |    | ●◆■ |    |    |    |
| Inverted IHC (n≥10/group)                                            |                                                               |    |    |    |     |    | ●■ |    |     |    |    |    |
| Immune gene expression (n≥7/group)                                   |                                                               | ●■ | ●■ | ●■ |     | ●■ | ●■ | ●■ |     | ●■ | ●■ | ●■ |
| IHC analysis (n≥8/group)                                             |                                                               |    |    |    |     | ●■ | ●■ |    |     |    |    |    |
| Correlation between P33 specific IgM and sea lice count (n≥12/group) |                                                               |    |    |    |     |    |    |    | ●■  |    |    |    |

**WPV:** weeks post-vaccination, **PL:** plasma, **AK:** Anterior kidney, **Sp:** spleen, **SK:** skin, PBS group (●), P33 LD group (◆) and P33 HD group (■).

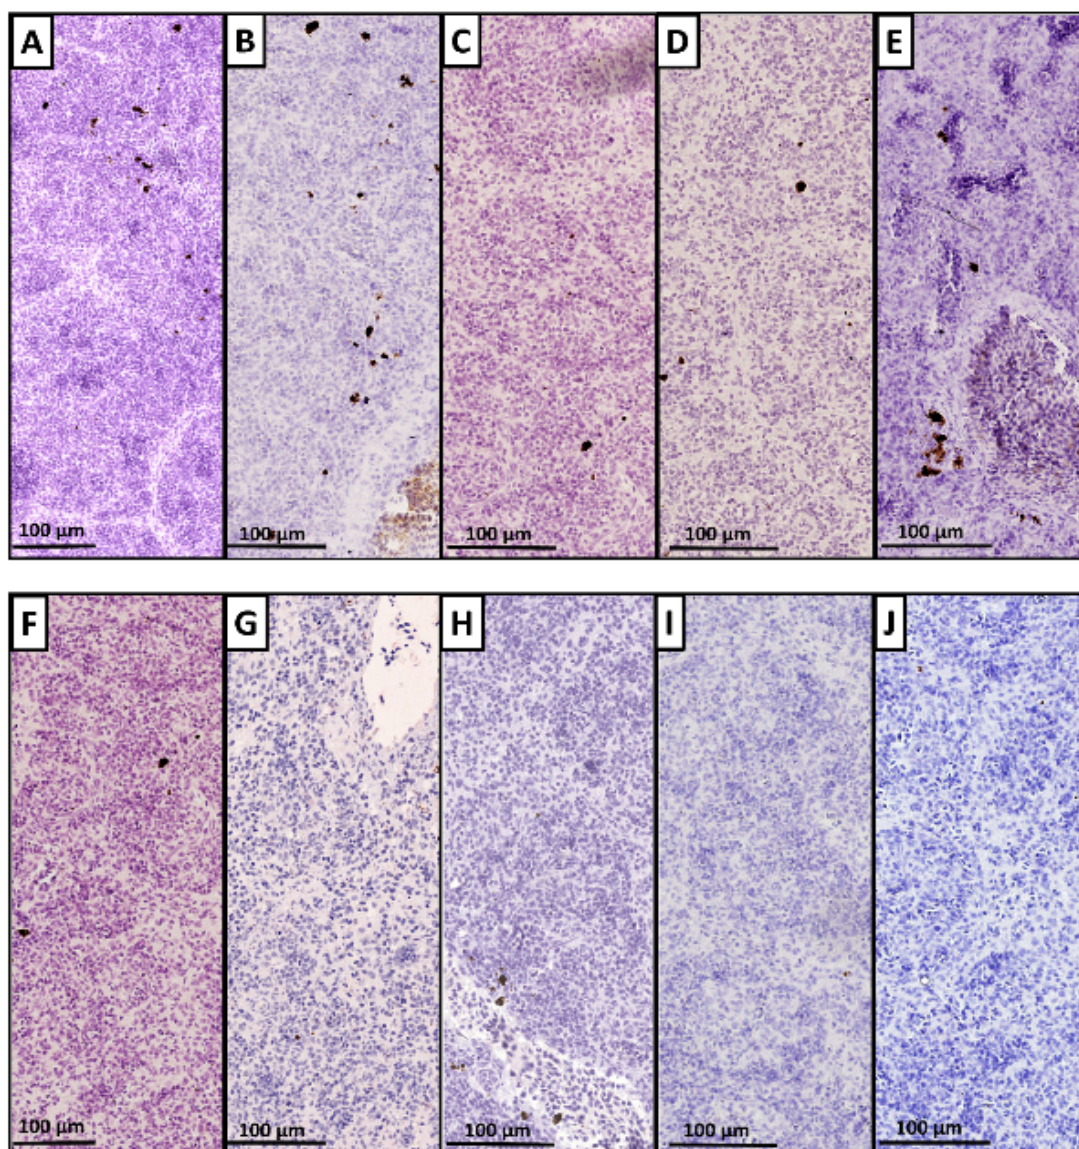

**Supplementary Figure S1.** In.IHC negative control spleen sections showed no specific signal for P33-specific antibodies.. Images of spleen collected from fish in P33 HD (A- E) and pbs (F - J) group at 14 wpv, represent sections incubated with HIS-tagged recombinant P30 protein (A and F), incubated with HIS-tagged recombinant P12 protein (B and G), omitting only P33 bait (C and H), omitting only secondary antibody (D and I), or omitting only HRP labeled anti-rabbit antibody (E and J).



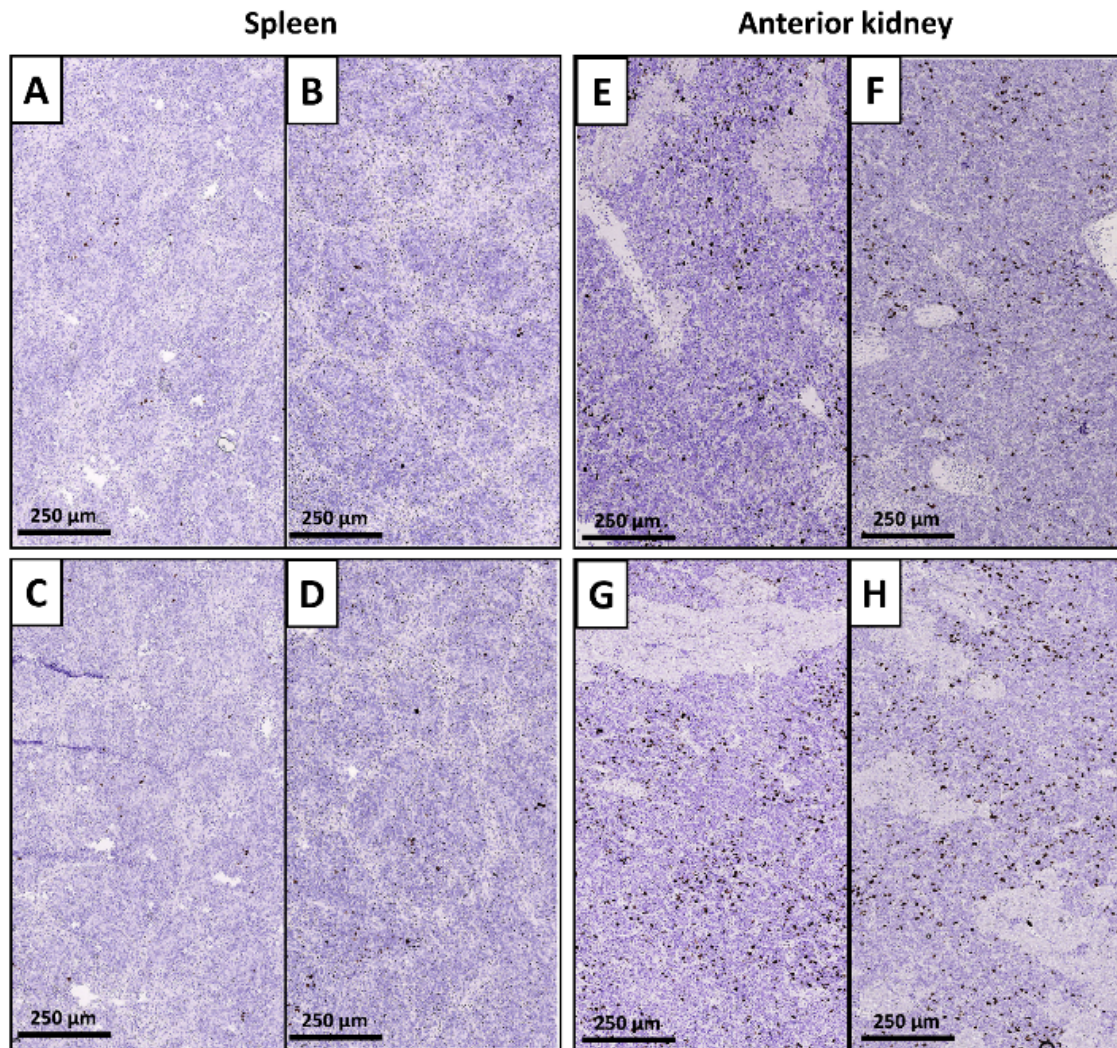

**Supplementary Figure S2.** IHC negative control spleen and anterior kidney showed no specific signal for IgM. Images of spleen (A – D) and anterior kidney (E – H) obtained from the pbs (A, B, E, and F) and P33 HD (C, D, G, and H) group at 14 wpv represent sections omitting only anti-IgM antibody (A, C, E, and G) or omitting only HRP labeled anti-mouse antibody (B, D, F, and H).
